# Supplementary material
Source: PubMed Central journal article supplement (PMC2762017)
Supplement: NIHMS138740-supplement-01.pdf [file NIHMS138740-supplement-01.pdf]

**Program Number:** 192.18      **Day / Time:** Sunday, Oct. 24, 9:00 AM – 10:00 AM

## Treatment with a serotonin reuptake inhibitor increases reproductive hormone secretion in stress sensitive monkeys.

J.L.Cameron<sup>1,2\*</sup>; J.A.Bytheway<sup>2</sup>; S.Guay<sup>2</sup>; C.L.Bethea<sup>1</sup>; D.Kerr<sup>2</sup>; N.Rockcastle<sup>2</sup>; J.M.Perel<sup>2</sup>; D.A.Axelsson<sup>2</sup>

1. *Psychiatry, Oregon Natl. Primate Res Ctr, Beaverton, OR, USA*; 2. *Univ Pittsburgh, Pittsburgh, PA, USA*

When exposed to stresses some individuals develop reproductive dysfunction (i.e., are stress-sensitive, SS), while others show a high level of stress resilience (HSR). We have previously reported that there are stable physiological characteristics that differentiate SS individuals, including lower peak estradiol levels in the follicular phase and lower peak progesterone levels in the luteal phase of the menstrual cycle. SS animals also have lower central serotonergic activity, as shown by lower gene expression for SERT and MAO-A, and a trend towards lower gene expression for TPH-1, 5HT-1A, and MAO-B. In this study we questioned whether chronic treatment with a serotonin reuptake inhibitor, citalopram, would increase reproductive hormone secretion in SS animals. Twenty five monkeys were initially exposed to a combination of mild social and metabolic stress (mild diet + moderate exercise + relocation) and were categorized as SS (stress rapidly induced anovulation; n=9), medium stress resilient (MSR; stress slowly induced anovulation; n=7) or HSR (maintained ovulatory menstrual cycles throughout stress; n=9). Later, half of the monkeys in each group were treated for 15-17 weeks with 1.2-4.8 mg/kg S-citalopram (bid), to elevate blood levels of citalopram into the therapeutic range for treating depression. S-citalopram treatment caused a significant increase in peak estradiol levels (pre-treatment:  $360 \pm 67$  pg/ml, post-treatment:  $544 \pm 82$  pg/ml,  $p=0.05$ ), and peak progesterone levels (pre-treatment:  $6.7 \pm 1.4$  ng/ml, post-treatment:  $11.3 \pm 1.8$  ng/ml,  $p=0.05$ ), with the greatest increases occurring in the most stress-sensitive animals. We conclude that treatment of stress-sensitive individuals with a drug that increases brain serotonin levels stimulates activity of the reproductive axis.

*Support Contributed By: NIH U54 HD18185 & RR00163*

**Citation:** J.L.Cameron, J.A.Bytheway, S.Guay, C.L.Bethea, D.Kerr, N.Rockcastle, J.M.Perel, D.A.Axelsson. Treatment with a serotonin reuptake inhibitor increases reproductive hormone secretion in stress sensitive monkeys.. Program No. 192.18. *2004 Abstract Viewer/Itinerary Planner*. Washington, DC: Society for Neuroscience

**2004 Copyright by the Society for Neuroscience all rights reserved. Permission to republish any abstract or part of an abstract in any form must be obtained in writing from the SfN Office prior to publication**

**Application Design and Programming Copyright ScholarOne, Inc. All Rights Reserved. Patent Pending.**
